# Supplementary material for: Elucidating Viral Communities During a Phytoplankton Bloom on the West Antarctic Peninsula
Source: Front Microbiol. 2019 May 14;10:1014. doi: 10.3389/fmicb.2019.01014 (PMC6527751; doi:10.3389/fmicb.2019.01014)
Supplement: Supplementary file 2 [file Table_2.XLSX]

## Sheet: Hoja1
Sample	Total reads quality trimmed	Eukaryote	Bacteria	Virus
Low Chlorophyll	26615335	37875	16032768	12413
High Chlorophyll	81235591	90395	55702144	33812
